# Supplementary material for: Expression of Synj2bp in mouse liver regulates the extent of wrappER-mitochondria contact to maintain hepatic lipid homeostasis
Source: PubMed Central journal article supplement (PMC9717519; doi:10.1186/s13062-022-00344-8), 2022-12-01
Supplement: 13062_2022_344_MOESM1_ESM.pdf [file 13062_2022_344_MOESM1_ESM.pdf]

**A**

Rrbp1 structure (AlphaFold)

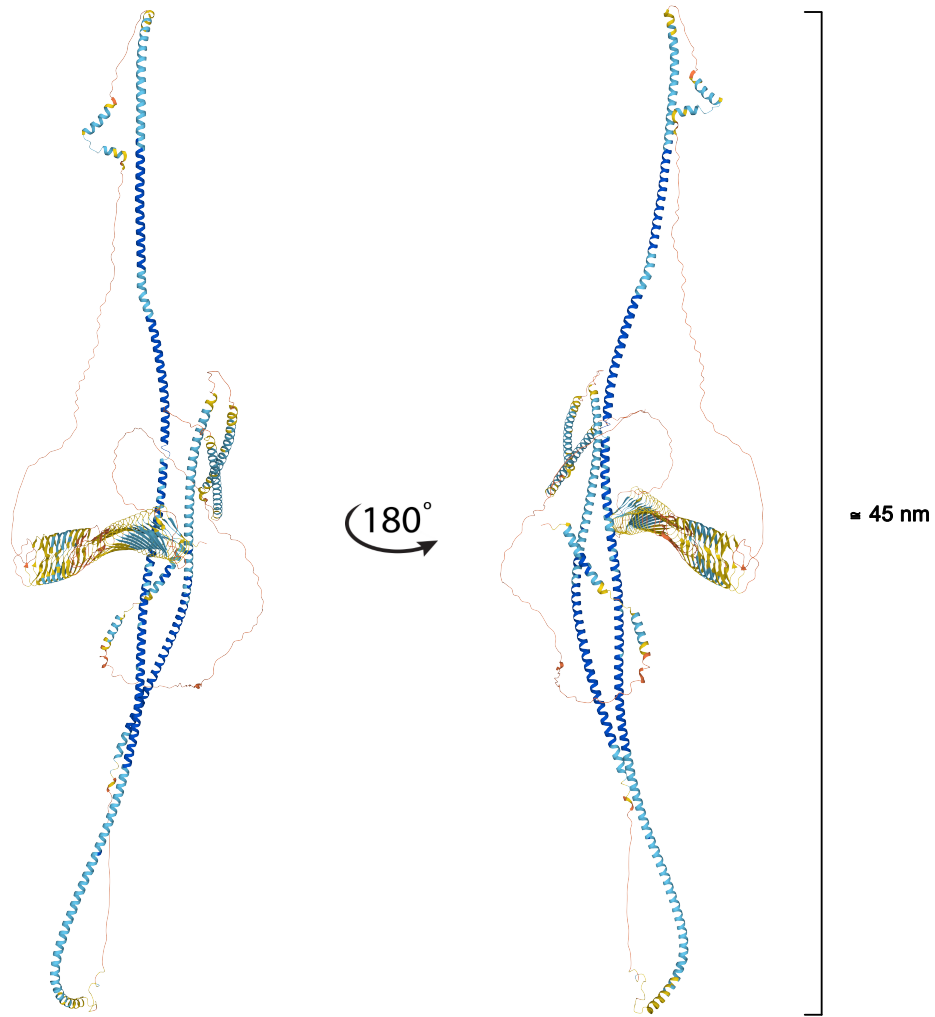**B** Number of mitochondria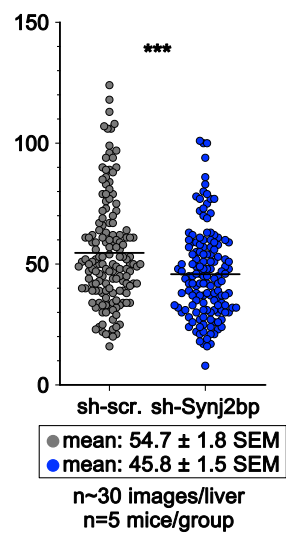**C** Mitochondria perimeter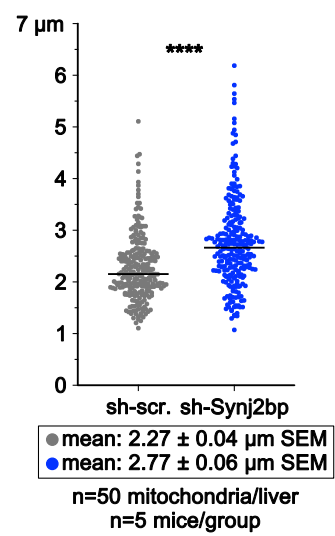

**Fig. S1 Synj2bp silencing in the mouse liver alters mitochondrial morphology.**

**A** AlphaFold-predicted 3D structure of mouse Rrbp1, which regulates wrappER-mitochondria contact distance [1]. **B,C** Quantitative EM morphometric analyses of the number and size (perimeter) of mitochondria present in control and Synj2bp-silenced livers. In **B**, each dot represents the number of mitochondria counted in a single low-magnification EM image of livers collected from mice injected with control and AAV8-shSynj2bp vectors. In **C**, each dot represents the length of the perimeter of the mitochondria imaged in high-magnification EM images. This study shows that Synj2bp-silenced livers have fewer but larger mitochondria (mice at 3 h postprandial). The Student's *t* test was used to calculate *p* values.

**A** Negative staining EM + anti-ApoB immunogold labelling

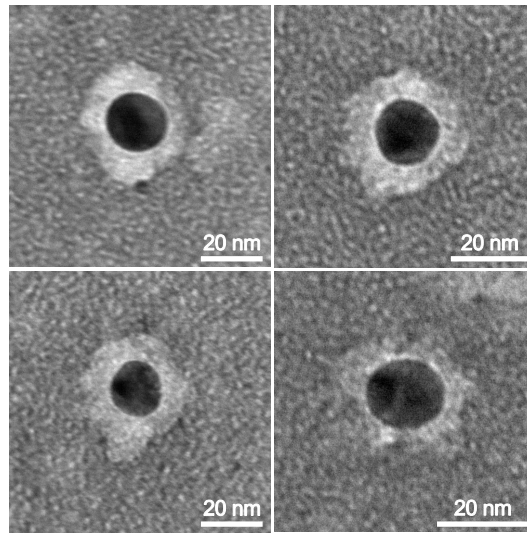

anti-ApoB immunolabelled lipoparticles floated  
from liver WAM fraction  
(gold particles diameter = 15nm)

**B** Morphometric analysis of ApoB-containing lipoparticles

diameter of anti-ApoB immunolabelled lipoparticles floated from liver WAM fractions

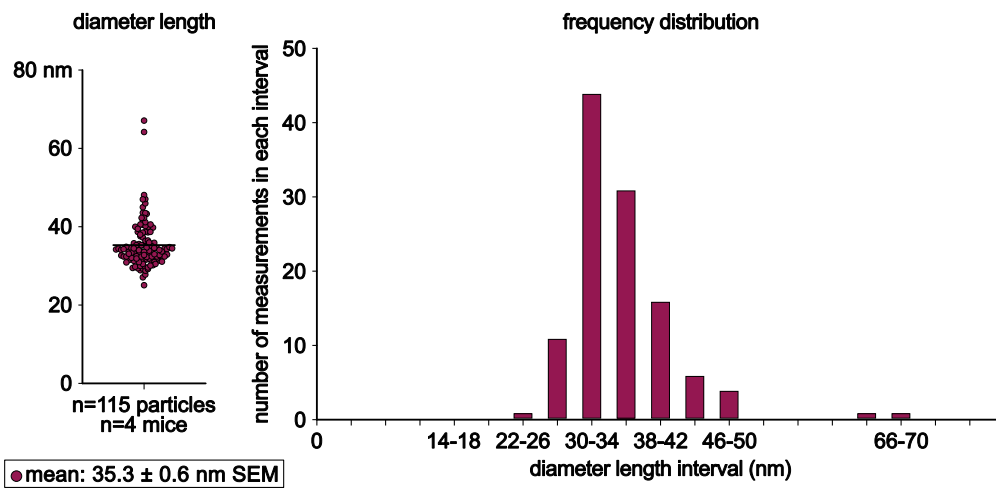

**Fig. S2 The wrappER contains ApoB-containing lipoparticles.**

**A,B** Negative staining EM coupled to immunogold labeling of anti-ApoB lipoparticles floated from mouse liver WAM-enriched fractions. **B** Size of ApoB-containing lipoparticles isolated from WAM fractions. The value of this parameter is expressed in nm and refers to the diameter of the lipoparticle. The right graph shows the frequency distribution of lipoparticle sizes. Gold particles diameter = 15 nm.

WAM: wrappER-associated mitochondria.

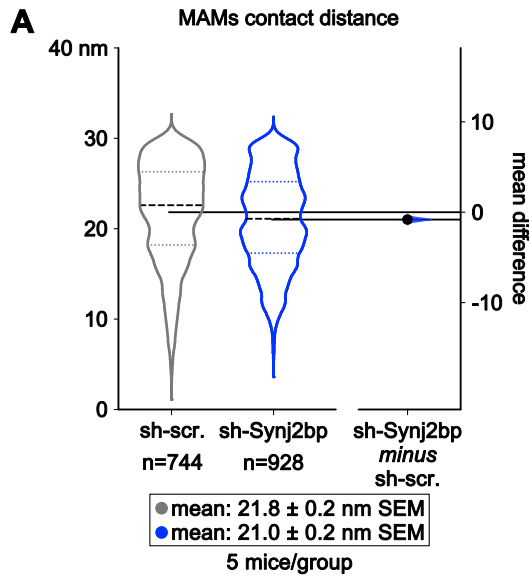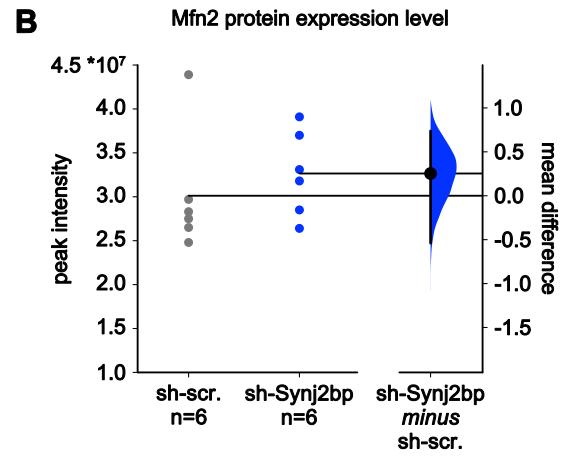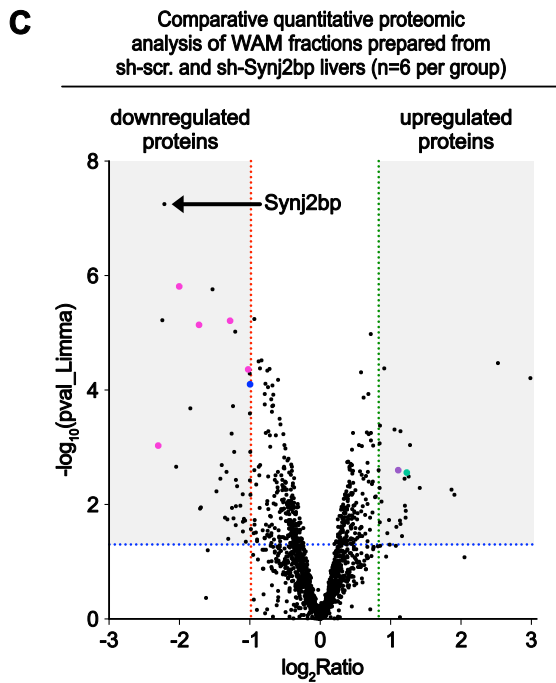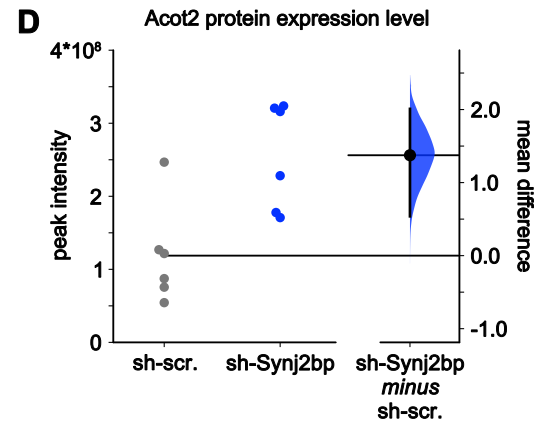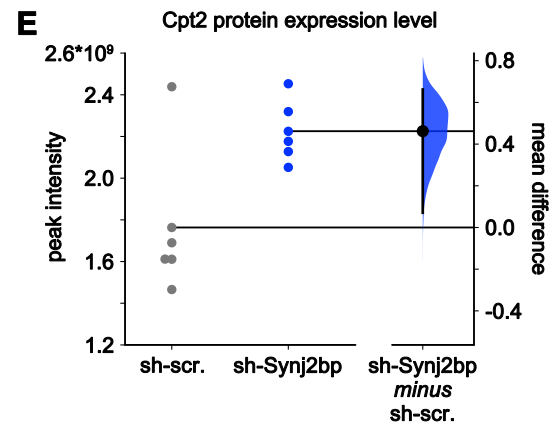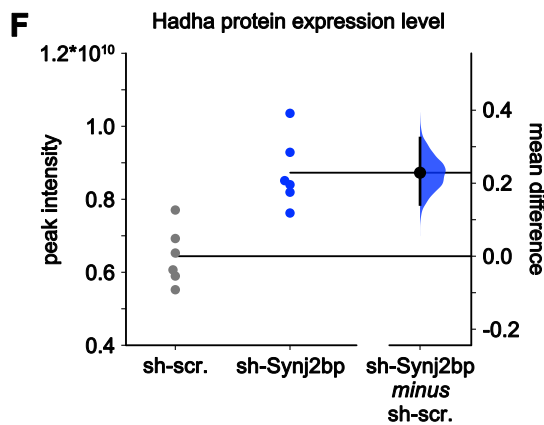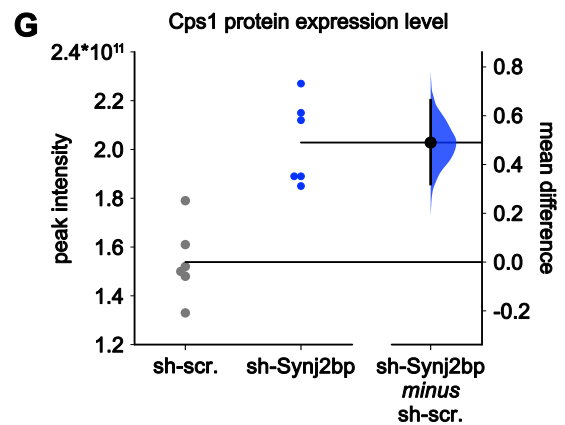

**Fig. S3 Synj2bp silencing in the mouse liver upregulates mitochondria fatty acid respiration capacity while down-regulating ApoE and Mups expression at the WAM.**

**A** Electron microscopy morphometric analyses of the MAMs contact distance in control and Synj2bp-silenced mouse livers. Data were processed by estimation statistics analysis **B** Estimation statistics analysis of the WAM proteomics data of the MAM tether Mfn2. **C** Comparative quantitative proteomic analysis. The volcano plot shows the proteins that are down- and up-regulated in WAM-enriched fractions isolated from Synj2bp-silenced livers compared to control AAV8-shScrambled injected mice. **D-G** Estimation statistics analysis of the WAM proteomics data related to the indicated proteins. **D-F** Enzymes that participate in mitochondrial FA respiration; their up-regulation indicates the activation of this catabolic process in Synj2bp-silenced livers. **G** Cps1 is the rate-limiting step of the urea cycle; its increased expression suggests a possible upregulation of this pathway.

**A** Synj2bp orthologs sequence alignment

**PDZ domain**

Q7ZV59\_Fish MNGSAH-SAPSDVEFTLKRGPAGLGFNIVGGVDQQYMMNDSGIYVAKIKENGAAALDGRLQEG  
 Q9D6K5\_Mouse MNGRVD-YLVTEEEINLTRGPSGLGFNIVGGTDQQYVSNDSGIYVSRIKEDGAAAQDGRLQEG  
 P57105\_Human MNGRVD-YLVTEEEINLTRGPSGLGFNIVGGTDQQYVSNDSGIYVSRIKENGAAALDGRLQEG  
 XP\_029454621\_Amphibia MNGSVD-YLAFDEEIQLRGPSGLGFNIVGGTDQQYICNDSGIYVSRIKEDGAAAVDGRLQEG  
 XP\_025951563\_Bird MNGSVAGGGLAEIEISLTRGPSGLGFNIVGGTDQQYISNDSIIYVSRIKKDGAAAYLDGRLQEG  
 \*\*\* . \* : \* .\*\*\*:\*\*\*\*\*.\*\*\*\*: \*\*\*.\*\*\*:\*\*\*:\*\*\* \*\*\*\*\*

**predicted**

Q7ZV59\_Fish DKILAINGRKLDNLSHGAAVELFRSAGEDVHLICIQRPVLQ-NGPTSSRADGESSALGTWTL  
 Q9D6K5\_Mouse DKILSVNGQDLKLLHQDAVDLFRNAGCAVSLRVQHRLPVQ-NGPIVHRGEGEPSGVPVAMVL  
 P57105\_Human DKILSVNGQDLKLLHQDAVDLFRNAGYAVSLRVQHRLQVQ-NGPIGHRGEGDPSGPIPFMVL  
 XP\_029454621\_Amphibia DQILAVNDQALKNLLHKEVVNLFNRNAGEDVKLVQHKAVQVQPNGPSGHRGDGESSGLSLSTVL  
 XP\_025951563\_Bird DKILAVNGRDLKDLRHKDAVELFRNAGYDVSLKIQRRLQPQ-NGPVSHRGDGESEGLPLAAIL  
 \*:\*\*\*:\*. :\*: \* \* .\*:\*\*\*.\*\* \* \* :\*: \* \*\*\* \*.:\*:\*... \*

**transmembrane domain**

Q7ZV59\_Fish FAV-VTLAVMTA-SFIAIKRFH--PRGPRGPF  
 Q9D6K5\_Mouse LPV-FALTMVAWAFVRYRKQL-----  
 P57105\_Human VPV-FALTMVAAWAFMRYRQQL-----  
 XP\_029454621\_Amphibia VPVLLACTAAAIWLAMKYRHRH-----  
 XP\_025951563\_Bird VPG-LALAVAAVWIVLRYRQRM-----  
 . : : : : \*::

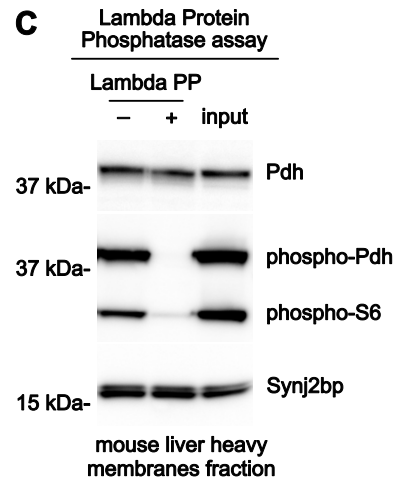

**B** Synj2bp phylogenetic tree

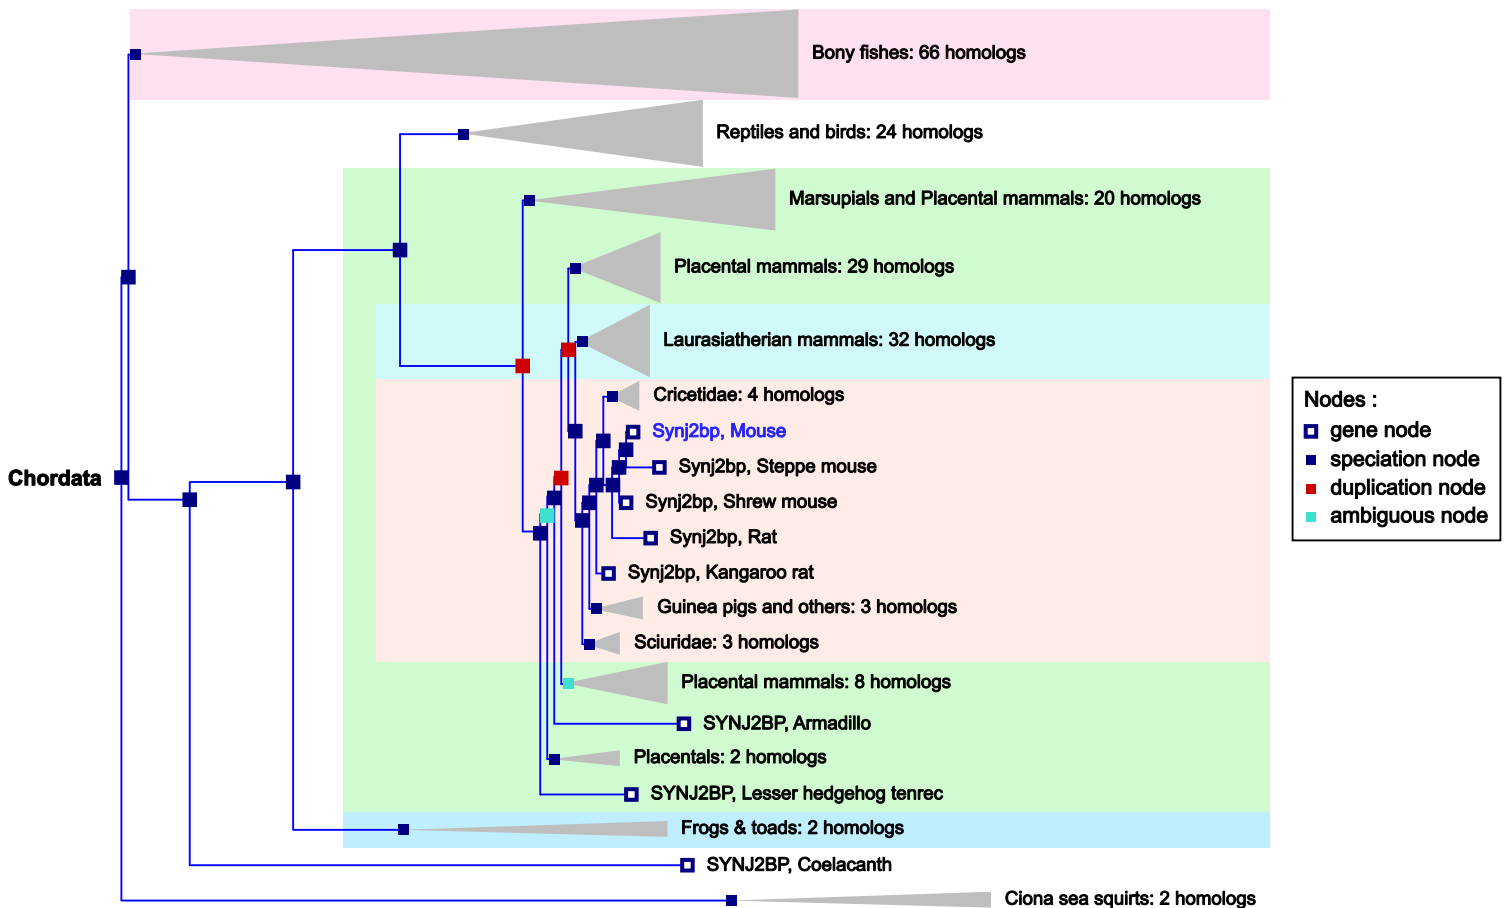

**Fig. S4 Synj2bp evolutionary analysis.**

**A** Multiple sequence alignment of representative Synj2bp orthologs from the indicated vertebrate groups. **B** Schematic representation of the mouse Synj2bp phylogenetic tree. **C** Lambda Protein Phosphatase assay on mouse liver heavy membranes fraction. The image shows the immunoblot analysis done using a mix of four antibodies that recognize Synj2bp, Pdh, phosphorylated Pdh (Ser293), and phosphorylated S6 (Ser240/244), respectively. Note that phosphatase treatment abolishes the signal generated by phospho-specific antibodies, used here as positive controls. This data indicates that the two forms of Synj2bp are likely not the result of Ser/Thr/Tyr phosphorylation.
