# Supplementary material for: Expression of Synj2bp in mouse liver regulates the extent of wrappER-mitochondria contact to maintain hepatic lipid homeostasis
Source: PubMed Central journal article supplement (PMC9717519; doi:10.1186/s13062-022-00344-8), 2022-12-01
Supplement: 13062_2022_344_MOESM3_ESM.pdf [file 13062_2022_344_MOESM3_ESM.pdf]

# Additional file 3

Mouse liver WAM-enriched fractions (8 µg/lane)

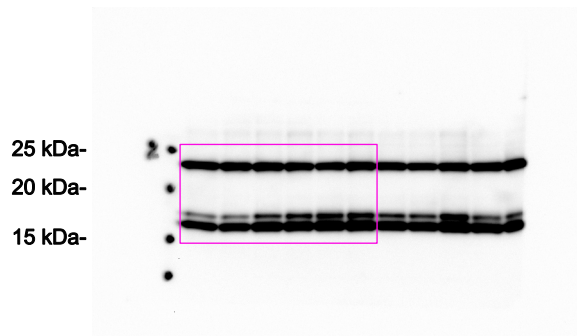

W.B. #1  
anti-MnSOD 1:10,000  
anti-Synj2bp 1:3,000

Mouse liver WAM-enriched fractions (10 µg/lane)

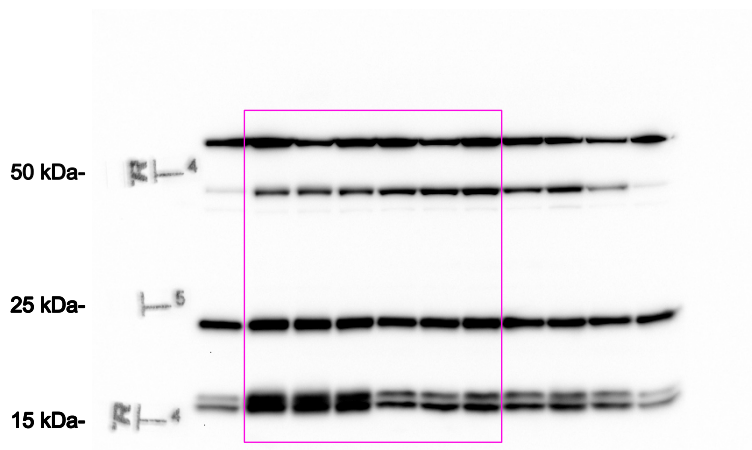

W.B. #2  
anti-Aif 1:1,500  
anti-Erp44 1:1,000  
anti-MnSOD 1:14,000  
anti-Synj2bp 1:1,000

# Additional file 3

## Mouse liver heavy membranes (40 µg/lane)

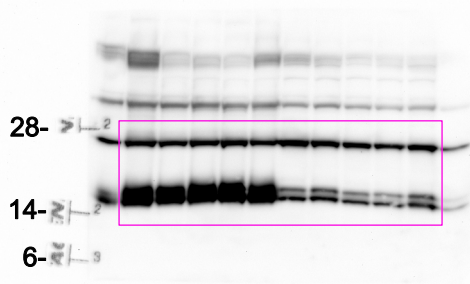

W.B. #3  
anti-MnSod 1:7,000  
anti-Synj2bp 1:750

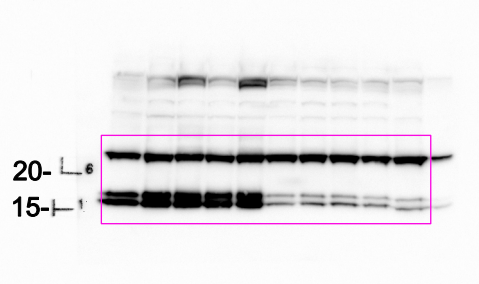

W.B. #4  
anti-MnSod 1:7,000  
anti-Synj2bp 1:750

## Mouse liver lysate (20 µg/lane)

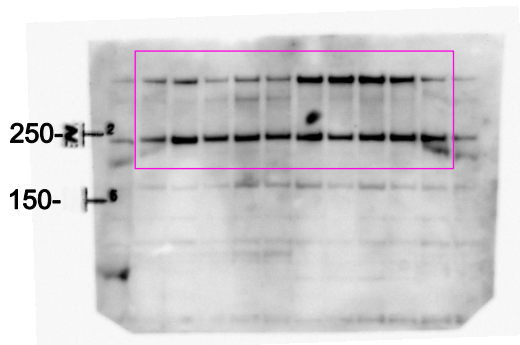

W.B. #5  
anti-ApoB 1:2,000

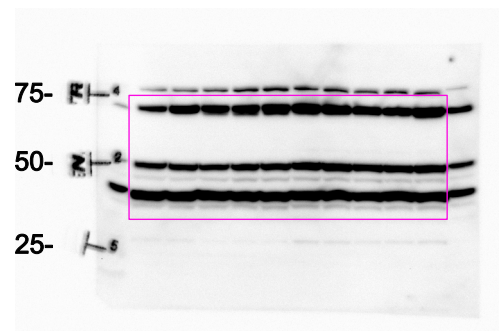

W.B. #6  
anti-Calnexin 1:18,000  
anti-Calreticulin 1:120,000  
anti-Actin 1:15,000

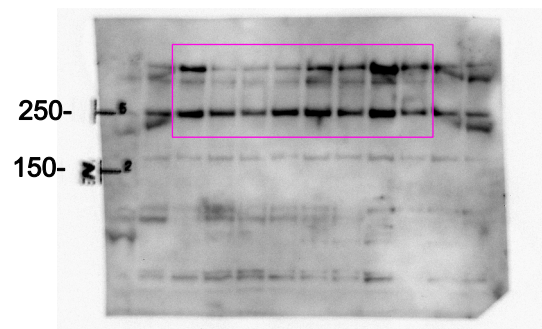

W.B. #7  
anti-ApoB 1:2,000

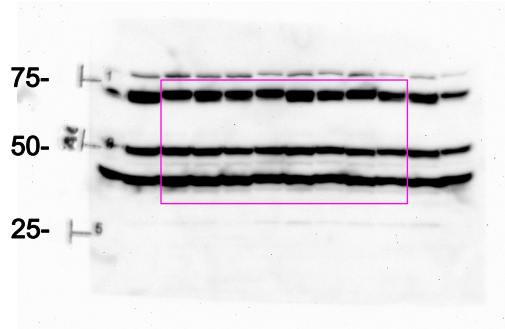

W.B. #8  
anti-Calnexin 1:18,000  
anti-Calreticulin 1:120,000  
anti-Actin 1:15,000

# Additional file 3

Mouse liver heavy membranes (20 µg/lane)

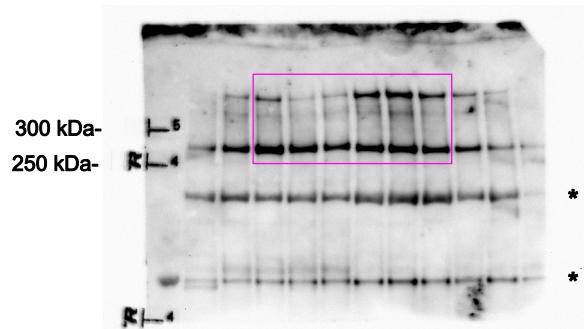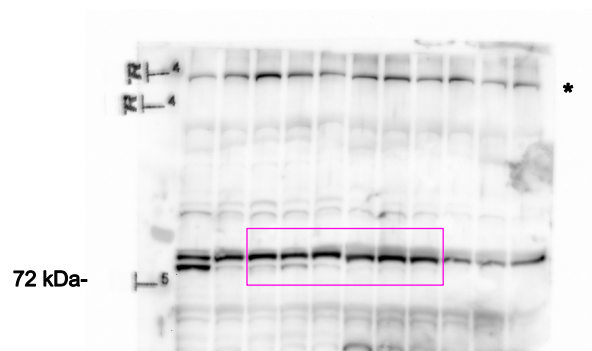

Mouse liver heavy membranes (20 µg/lane)

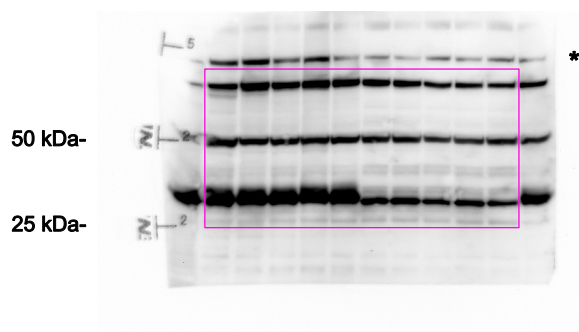

# Additional file 3

Mouse liver heavy membranes (15 µg/lane)

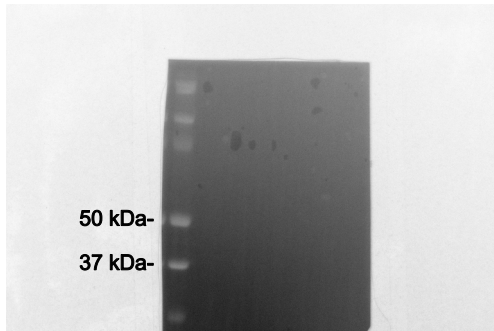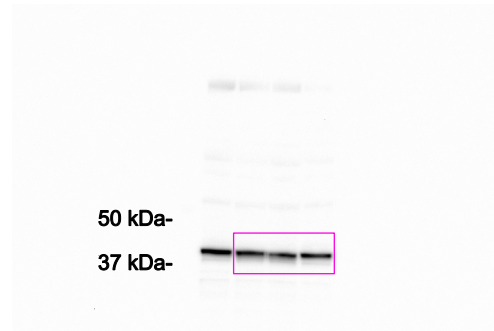

W.B. #12  
anti-Pdh 1:2,000

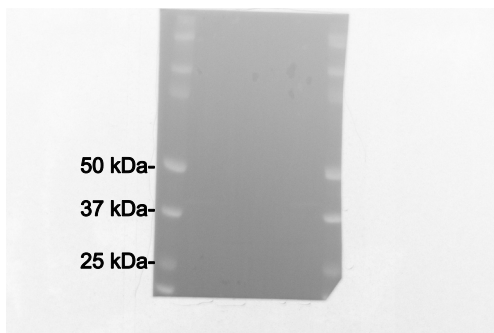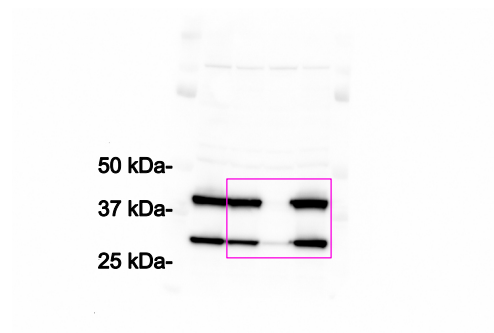

W.B. #13  
anti-phospho Pdh 1:2,000  
anti-phospho S6 1:3,000

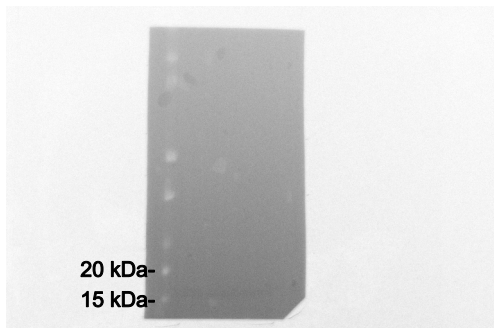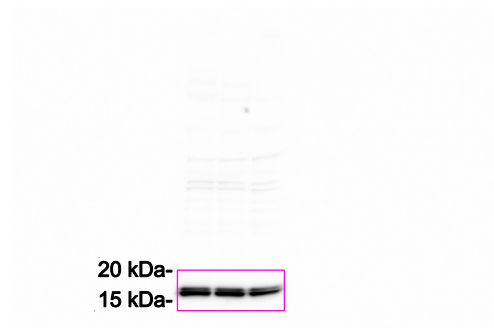

W.B. #14  
anti-Synj2bp 1:750
